# Supplementary material
Source: HighWire-hosted journal article supplement (http://www.qdcxjkg.com/highwire/filestream/113559/field_highwire_adjunct_files/0/ERJ-RSVpaper_supfig12.pdf)

**Supplementary Figure 1.** Proportions of co-infections among HRV, RSV, Inf A and AdV infections.

a. HRV

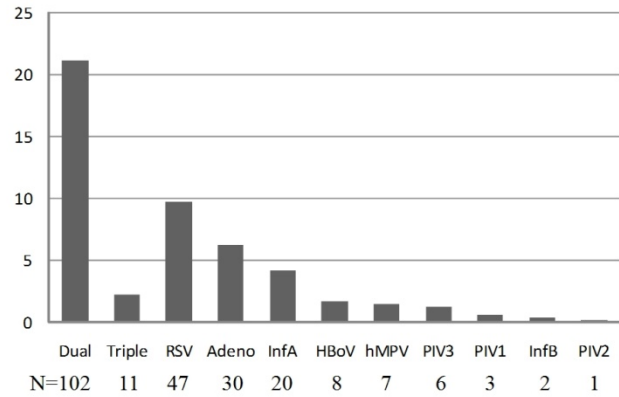

b. RSV

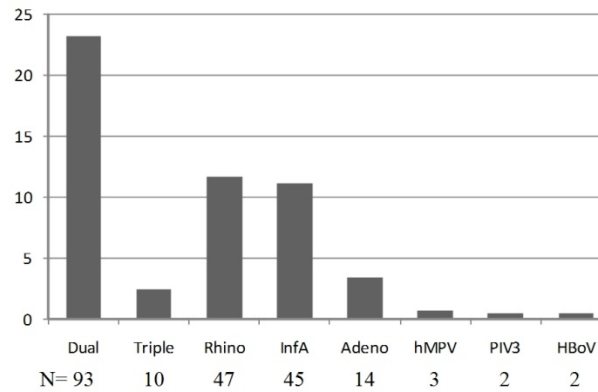

c. Inf A

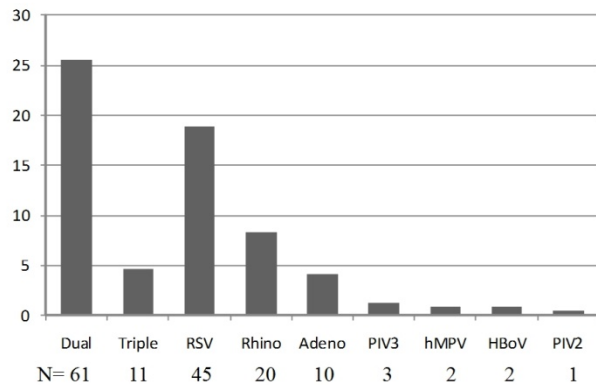

d. AdV

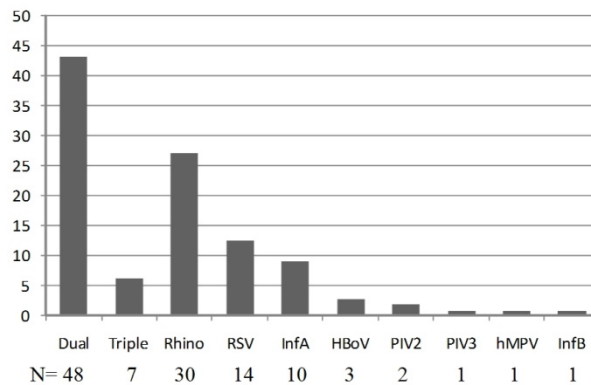

Note: x-axis shows the number of positive cases and the y-axis shows the proportion of total positive

**Supplementary Figure 2.** Incidence of each viral infection among children <5 years hospitalized with ARI (per 1,000 child-months), Khanh Hoa Province, Vietnam, 2007—2010.

**A. HRV**

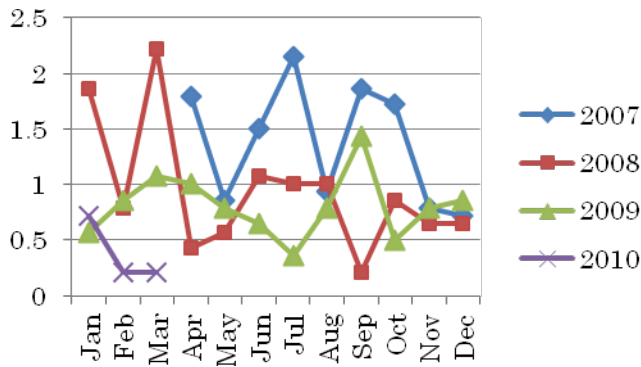

**B. RSV**

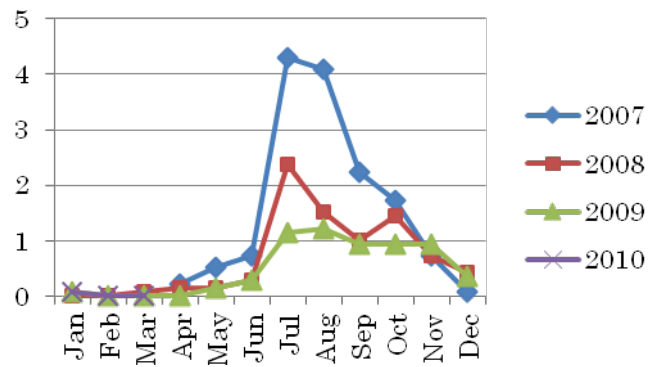

**C. Influenza A**

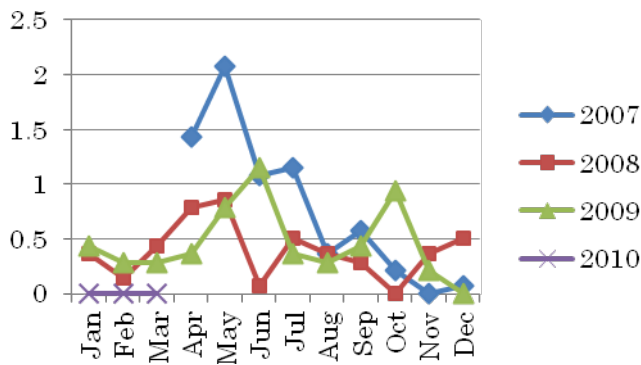

**D. AdV**

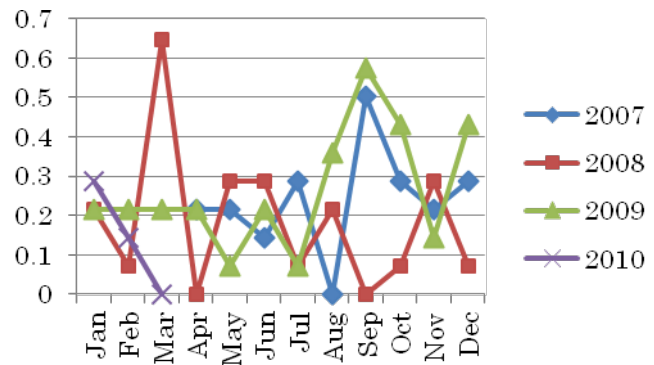

**E. PIV3**

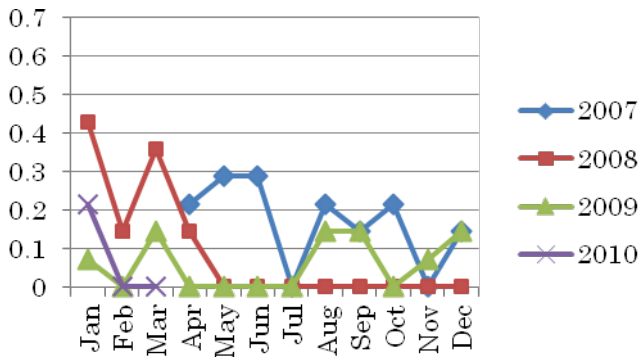

**F. HMPV**

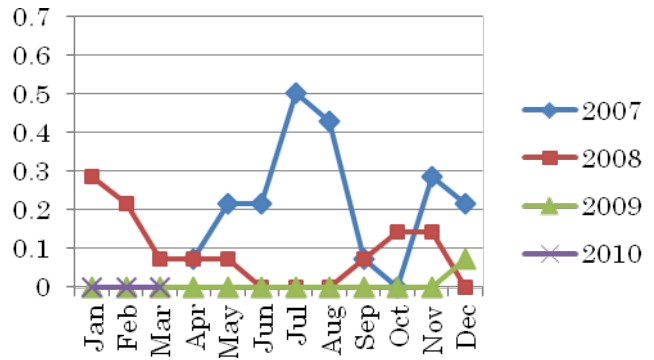

**G. HBoV**

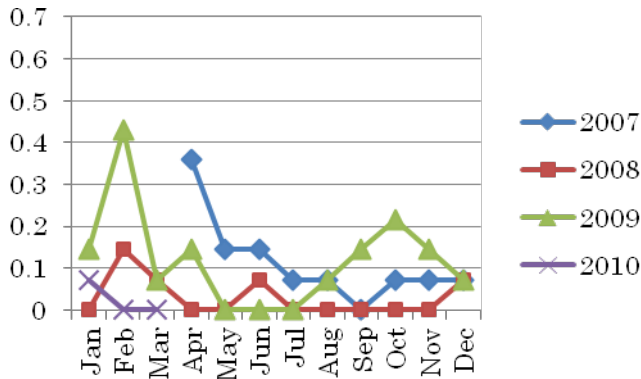

**H. Influenza B**

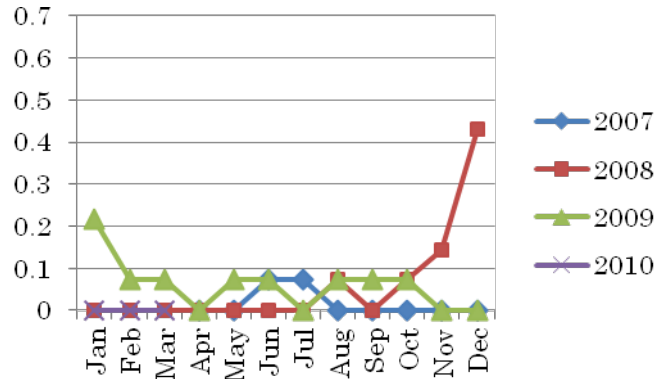

Supplement: ERJ-RSVpaper_supfig12.pdf [file ERJ-RSVpaper_supfig12.pdf]
